# Supplementary material
Source: HighWire-hosted journal article supplement (https://bibliotheek.ehb.be/content/suppl/2024/07/04/bmjgh-2023-014483)
Supplement: bmjgh-2023-014483supp002_data_supplement.pdf [file bmjgh-2023-014483supp002_data_supplement.pdf]

| Date | First author's last name and year | DOI | Is the paper referring to a <b>definition of process evaluation?</b> (yes/no) | Are they conducting a <b>formative evaluation?</b> (yes/no) | Was the <b>process evaluation participatory?</b> (yes/no) |
|------|-----------------------------------|-----|-------------------------------------------------------------------------------|-------------------------------------------------------------|-----------------------------------------------------------|
|      |                                   |     |                                                                               |                                                             |                                                           |

| Name the component | Description of component |
|--------------------|--------------------------|
|                    |                          |
