# Supplementary material
Source: HighWire-hosted journal article supplement (https://bibliotheek.ehb.be/content/suppl/2024/07/04/bmjgh-2023-014483)
Supplement: bmjgh-2023-014483supp003_data_supplement.pdf [file bmjgh-2023-014483supp003_data_supplement.pdf]

| Author(s)                 | Year | Public health topic/issue                             | Country                  | Guiding framework*<br>*Frameworks are further described in Table 2 | Formative evaluation | Participatory evaluation |
|---------------------------|------|-------------------------------------------------------|--------------------------|--------------------------------------------------------------------|----------------------|--------------------------|
| Anselma et al. (28)       | 2019 | Physical activity and dietary behaviour with children | The Netherlands          | Glasgow et al. (29)                                                | -                    | -                        |
| Bauermeister et al. (30)  | 2017 | HIV/STI program                                       | United States of America | -                                                                  | -                    | Yes                      |
| Beckerman-Hsu et al. (31) | 2020 | Obesity prevention in low-income preschool children   | United States of America | Grant et al. (32)                                                  | -                    | -                        |
| Berge et al. (33)         | 2017 | Childhood obesity prevention                          | United States of America | -                                                                  | -                    | -                        |
| Brooks et al. (34)        | 2019 | Service user in mental health care planning           | The United Kingdom       | -                                                                  | -                    | -                        |
| Brussoni et al. (35)      | 2012 | Injury surveillance                                   | Canada                   | -                                                                  | -                    | -                        |
| Cameron et al. (36)       | 2019 | Workplace alcohol prevention                          | Australia                | -                                                                  | -                    | -                        |
| Cedstrand et al. (37)     | 2020 | Workplace wellness in the construction industry       | Sweden                   | Moore et al. (9), Nielsen and Randall (38)                         | -                    | -                        |
| Chrisman et al. (39)      | 2002 | Disease control and prevention                        | United States of America | -                                                                  | -                    | -                        |
| De Bock (40)              | 2010 | Physical activity in preschools                       | Germany                  | -                                                                  | -                    | -                        |
| De Rosi et al. (41)       | 2020 | Promotion of healthy living targeting adolescents     | Italy                    | -                                                                  | -                    | -                        |
| Dean et al. (42)          | 2022 | Nutrition and dietary behaviour in children           | The United Kingdom       | Saunders et al. (8)                                                | -                    | -                        |
| Den Broeder et al. (43)   | 2016 | Health impact assessment                              | The Netherlands          | -                                                                  | -                    | -                        |
| Dixon-Ibarra et al. (44)  | 2016 | Physical Activity Health Promotion                    | United States of America | -                                                                  | Yes                  | -                        |

|                           |      |                                                      |                                                |                             |     |     |
|---------------------------|------|------------------------------------------------------|------------------------------------------------|-----------------------------|-----|-----|
| Dyer et al. (45)          | 2014 | Community-based natural resource management          | Zambia/Democratic Republic of Congo/Mozambique | Rowe and Frewer (46)        | -   | -   |
| Edwards and Highuchi (47) | 2018 | Improving long-term care                             | Canada                                         | -                           | -   | -   |
| Elinder et al. (48)       | 2012 | Obesity prevention                                   | Sweden                                         | -                           | -   | -   |
| Frable et al. (49)        | 2006 | Obesity prevention with low-income families          | United States of America                       | -                           | -   | -   |
| Fusari et al. (50)        | 2020 | After stroke rehabilitation                          | The United Kingdom                             | Moore et al. (9)            | Yes | -   |
| Geelen et al. (51)        | 2020 | Physical activity during hospitalisation             | Netherlands                                    | Moore et al. (9)            | -   | -   |
| Gensby et al. (52)        | 2018 | Occupational rehabilitation                          | Norway                                         | -                           | Yes | -   |
| Gibbons et al. (53)       | 2016 | Health disparities                                   | United States of America                       | -                           | -   | Yes |
| Greer et al. (54)         | 2018 | Drug use                                             | Canada                                         | Greer et al. (55)           | -   | -   |
| Greer et al. (55)         | 2016 | Harm reduction and substance use                     | Canada                                         | Greer et al. (55)           | -   | -   |
| Gupta et al. (56)         | 2015 | Work ability among industrial workers                | Denmark                                        | Nielsen and Abildgaard (38) | -   | -   |
| Gupta et al. (56)         | 2017 | Physical activity of industrial workers              | Denmark                                        | -                           | -   | -   |
| Harper (57)               | 2003 | HIV prevention                                       | United States of America                       | -                           | Yes | Yes |
| Hassenforder et al. (58)  | 2016 | Pollution and depletion of freshwater resources      | Uganda                                         | -                           | -   | -   |
| Heggdal et al. (59)       | 2021 | Self-management of chronic illness                   | Norway                                         | -                           | -   | -   |
| Hetherington et al. (60)  | 2017 | Sanitation and hygiene                               | Tanzania                                       | -                           | -   | -   |
| Hinckson et al. (61)      | 2017 | Healthier community environments                     | New Zealand                                    | Linnan & Steckler (62)      | -   | -   |
| Igel et al. (63)          | 2017 | Health promotion in socially deprived neighbourhoods | Germany                                        | Moore et al. (9)            | -   | -   |

|                         |      |                                                       |                                     |                          |     |   |
|-------------------------|------|-------------------------------------------------------|-------------------------------------|--------------------------|-----|---|
| Keller et al. (64)      | 2022 | Workplace wellness for people with chronic diseases   | United States of America            | -                        | -   | - |
| Kelly et al. (65)       | 2017 | Breast cancer                                         | United States of America            | -                        | Yes | - |
| Kteily-Hawa et al. (66) | 2019 | Peer leader training for sexual health                | Canada                              | -                        | Yes | - |
| Lelie et al. (67)       | 2022 | Workplace health promotion in occupational settings   | The Netherlands                     | Nielsen and Randall (38) | -   | - |
| Magnusson et al. (68)   | 2014 | Healthy weight in children                            | Sweden                              | Saunders et al. (8)      | Yes | - |
| Marinescu et al. (69)   | 2013 | Health disparities                                    | United States of America            | -                        | Yes | - |
| McMaughan et al. (70)   | 2021 | Home health assessment for children with disabilities | United States of America            | Moore et al. (9)         | -   | - |
| Morgan et al. (71)      | 2019 | Dementia care in rural locations                      | Canada                              | Damschroder et al. (13)  | Yes | - |
| Muvuka et al. (72)      | 2020 | Mental health literacy to tackle depression           | United States of America            | -                        | -   | - |
| Nomura et al. (73)      | 2009 | Dementia and cognitive rehabilitation                 | Japan                               | -                        | -   | - |
| Palmer et al. (74)      | 2015 | Community mental health setting                       | Canada                              | Glasgow et al. (29)      | -   | - |
| Parker et al. (75)      | 2003 | Asthma                                                | United States of America            | -                        | Yes | - |
| Plumb et al. (76)       | 2004 | Breast cancer research                                | United States of America            | -                        | Yes | - |
| Reeve et al. (77)       | 2016 | Primary mental health care                            | The United Kingdom                  | -                        | Yes | - |
| Reininger et al. (78)   | 2010 | Obesity prevention                                    | United States of America and Mexico | -                        | -   | - |
| Robertson et al. (79)   | 2018 | Physical activity for men                             | Ireland                             | Moore et al. (9)         | -   | - |

|                        |      |                                                |                          |                          |     |   |
|------------------------|------|------------------------------------------------|--------------------------|--------------------------|-----|---|
| Schelvis et al. (80)   | 2016 | Occupational health in schools                 | The Netherlands          | Nielsen and Randall (38) | -   | - |
| Shahmanesh et al. (81) | 2021 | HIV prevention for adolescents and youth       | South Africa             | -                        | Yes | - |
| Sormunen et al. (82)   | 2011 | Health promotion in elementary schools         | Finland                  | -                        | -   | - |
| Tolma et al. (83)      | 2009 | Community development to address health issues | United States of America | Linnan and Steckler (62) | -   | - |
| Wilcox et al. (84)     | 2010 | Physical activity and dietary habits           | United States of America | Saunders et al. (8)      | -   | - |
| Yeary et al. (85)      | 2015 | Weight loss maintenance and obesity prevention | United States of America | Linnan and Steckler (62) | -   | - |
